# Supplementary material
Source: ML conference proceedings conference paper supplement (https://www.ecva.net/papers/eccv_2024/papers_ECCV/html/6270_ECCV_2024_paper.php)
Supplement: Supplementary file 1 [file 06270-supp.pdf]

## Appendix

### 6 Network Design of Ours-S and BL-S

The detailed designs of two simplified models Ours-S and BL-S are illustrated in Fig. 10. The Hyper Decoder consists of two modules, Hyper Decoder Scales and Hyper Decoder Means, which have identical network structures and each generates the estimated  $\sigma$  and  $\mu$  for  $\hat{y} \sim \mathcal{N}(\mu, \sigma^2)$ . The RAT after the Hyper Decoder also consists of both the scale and mean portions, which is not fully depicted in Fig. 2 (a) and Fig. 10 for brevity. The network architectures of Hyper Encoder and Decoder are shown in Tab. 4.

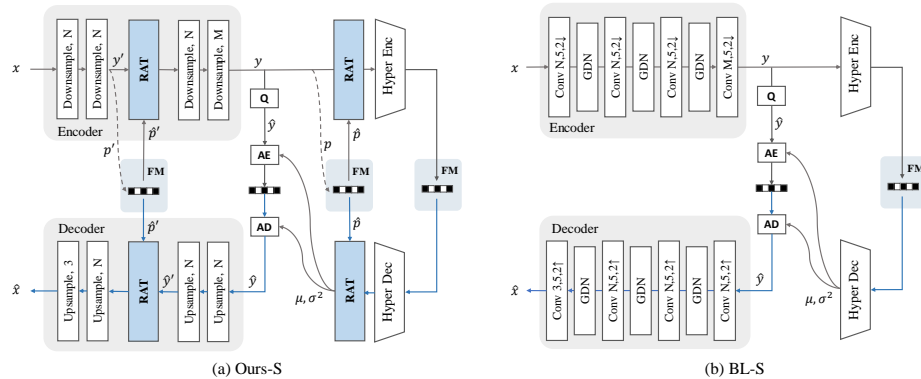

**Fig. 10:** The overall framework of Ours-S and BL-S. We construct these two simplified models without self-attention and auto-regressive mechanisms. FM is a Factorized Model [5]. The details of Hyper Encoder and Decoder are shown in Tab. 4.

### 7 Rate-Distortion Performance on MS-SSIM

We also compare the MS-SSIM results with other LIC methods and VTM-17.0. Here we additionally introduce some LIC methods, *e.g.* Factorize Model [5] (denoted as Balle2017), Hyperprior Entropy Model [6] (denoted as Balle2018), Joint Autoregressive and Hierarchical Priors Model [33] (denoted as Minnen2018). Fig. 11 shows that our SegPIC outperforms these methods.

**Table 4:** The network architecture of Hyper Encoder, Hyper Decoder Scales, and Hyper Decoder Means. "Conv 256,3,2↓" means the convolution operation with out-channel 256, kernel size 3 and downsample step 2. "TConv" means transposed convolution.

| Hyper Encoder | Hyper Decoder Scales | Hyper Decoder Means |
|---------------|----------------------|---------------------|
| Conv 320,3,1  | Conv 192,3,1         | Conv 192,3,1        |
| GELU          | GELU                 | GELU                |
| Conv 288,3,1  | TConv 224,3,2↑       | TConv 224,3,2↑      |
| GELU          | GELU                 | GELU                |
| Conv 256,3,2↓ | Conv 256,3,1         | Conv 256,3,1        |
| GELU          | GELU                 | GELU                |
| Conv 224,3,1  | TConv 288,3,2↑       | TConv 288,3,2↑      |
| GELU          | GELU                 | GELU                |
| Conv 192,3,2↓ | Conv 320,3,1         | Conv 320,3,1        |

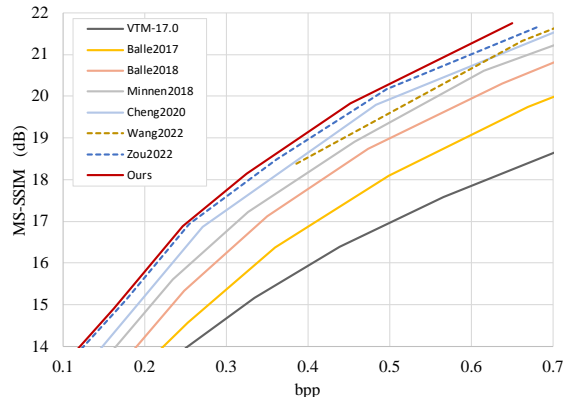

**Fig. 11:** The rate-distortion performance on Kodak. The metrics are bpp↓ and MS-SSIM↑. All the LIC methods are optimized by loss function Eq. 3, where the distortions can be formulated as  $D = (1 - \text{MS-SSIM}(x, \hat{x}))$ .
